# Supplementary material for: An eco-friendly citric acid-activated high-performance coal-derived hard carbon anode for sodium-ion batteries
Source: Royal Society of Chemistry journal article supplement (doi:10.1039/d5nj04040j), 2025-01-01
Supplement: d5nj04040j1.pdf [file d5nj04040j1.pdf]

## **An Eco-Friendly Citric Acid-Activated High-Performance Coal-Derived Hard Carbon Anode for Sodium-Ion Batteries**

Yating Zhang<sup>ab\*</sup>, Yuan Liu<sup>a</sup>, Youyu Zhu<sup>a</sup>, Rui Zhou<sup>a</sup>, Keke Li<sup>a</sup>, Weibin Deng<sup>a</sup>, Qianqian Liu<sup>a</sup>, Haiquan Yu<sup>a</sup> and Yuanliu Gao<sup>a</sup>

<sup>a</sup> College of Chemistry and Chemical Engineering, Xi'an University of Science and Technology, Xi'an 710054, China

E-mail: zhangyt@xust.edu.cn

<sup>b</sup> Key Laboratory of Coal Resources Exploration and Comprehensive Utilization, Ministry of Natural Resources, Xi'an 710021, China

## Preparation of Hard Carbon Materials

Bituminous coal was crushed to 200 mesh and sequentially washed with HCl and HF solutions at 80 °C to remove mineral impurities; the resulting sample is denoted BC. Then, 2 g of BC powder was ball-milled for 4 hours with citric acid at mass fractions of 10 %, 30 %, and 50 % (relative to BC mass). Subsequently, the mixed samples were placed in a tube furnace and carbonized under an argon atmosphere by heating to 1300 °C at a ramp rate of 3 °C min<sup>-1</sup>, followed by holding for 2 h. The resulting carbonized samples are labeled NHC-x (x=1, 3, 5, corresponding to the citric acid addition ratio). For comparison, the de-ashed bituminous coal powder (BC) was directly carbonized under identical conditions to obtain sample NHC-0.

## Material Characterization

The morphology of prepared samples was characterized with scanning electron microscopy (SEM, Phenom Pro, Netherlands). X-ray diffraction (XRD, Rigaku D/Max 2500 with Cu K $\alpha$  radiation) and Raman spectroscopy (Renishaw MKI-2000 with 532 nm laser) were equipped to observe the structural characterization. X-ray photoelectron spectroscopy (XPS, PHI-1600ESCA) analysis was carried out to obtain surface elemental information of materials. N<sub>2</sub> adsorption isotherms were measured on NOVA 3200e at 77 K.

## Electrochemical Performance Evaluation

The electrochemical performance of the samples was evaluated in sodium-ion half-cells (CR2032-type). The working electrode was prepared by homogenizing 80 wt% active material, 10 wt% Super P carbon black, and 10 wt% sodium carboxymethyl cellulose (CMC) in deionized water. The resulting slurry was uniformly coated onto a copper current collector and dried at 80 °C under vacuum for approximately 12 h. The cells were assembled in an argon-filled glove box with sodium metal as the counter/reference electrode, a glass fiber separator, and an electrolyte consisting of 1.5 M NaPF<sub>6</sub> in a mixture of ethylene carbonate and diethyl carbonate (EC: DEC = 1:1 by volume). Galvanostatic charge–discharge (GCD) tests were carried out on a LAND CT2001A system within a voltage range of 0.01–2.5 V.

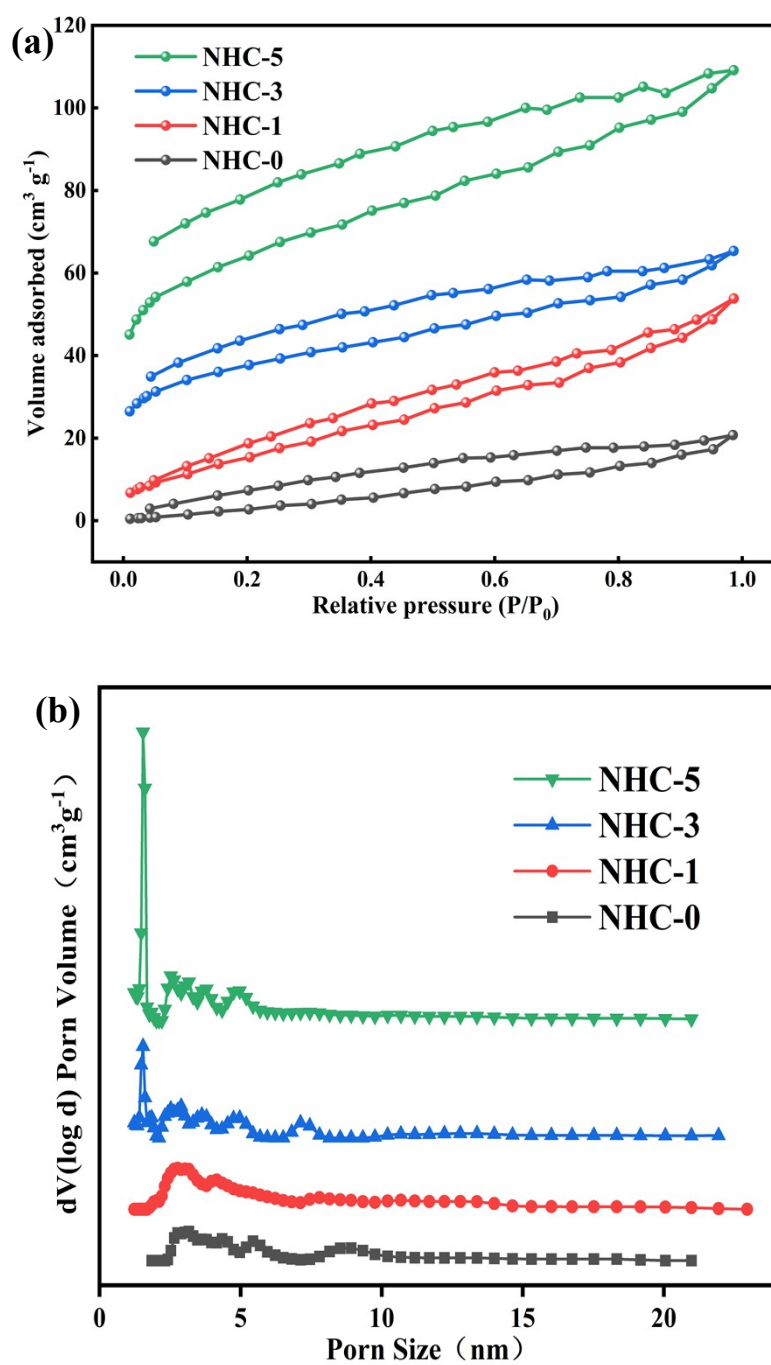

**Figure S1. (a)  $N_2$  adsorption/desorption isotherms and (b) Pore size distribution of obtained samples.**

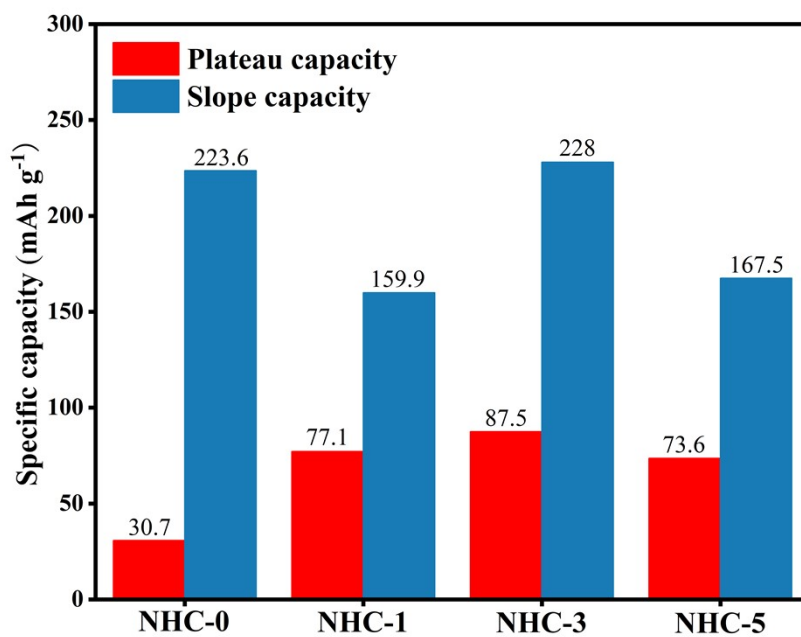

**Figure S2. Comparison of plateau area capacity and slope area capacity**

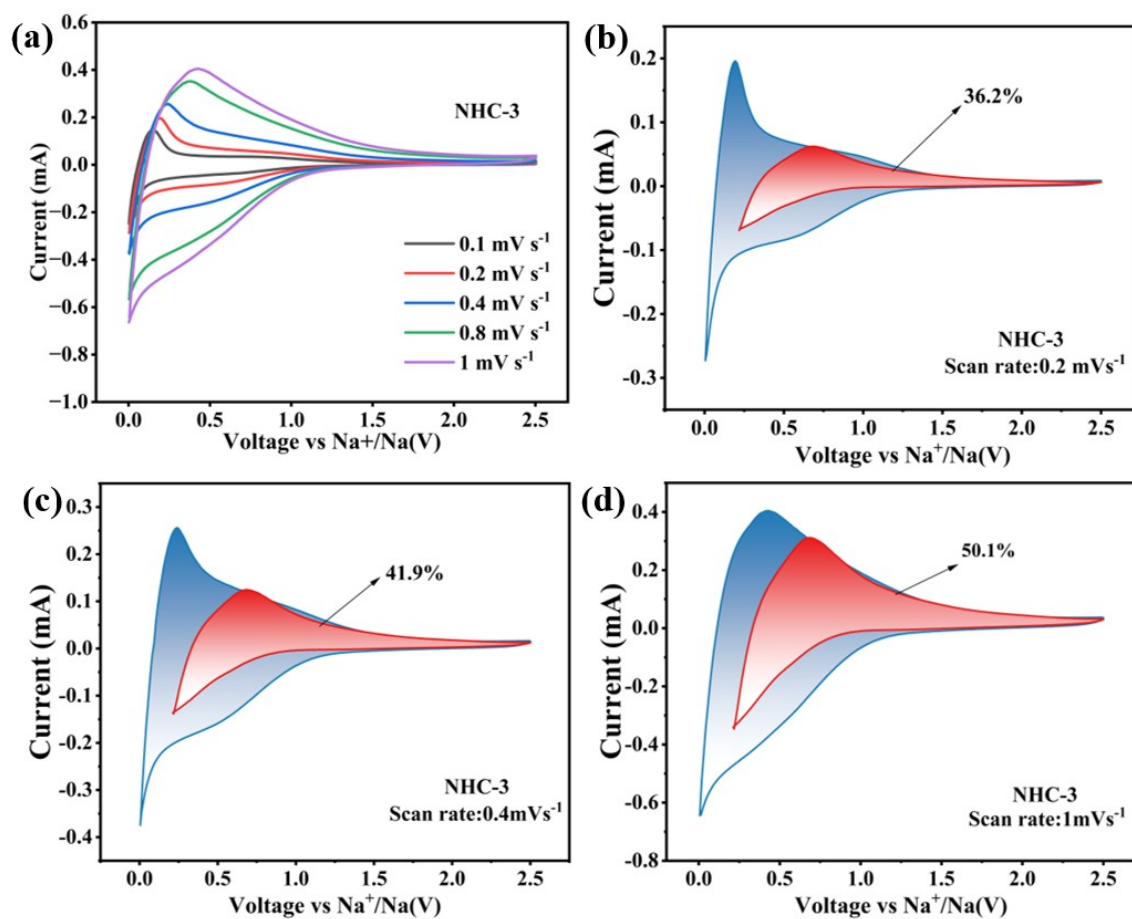

**Figure S3.** (a) Cyclic voltammetry (CV) curves at different scan rates ; (b) Capacitive contribution ratios at different scan rates

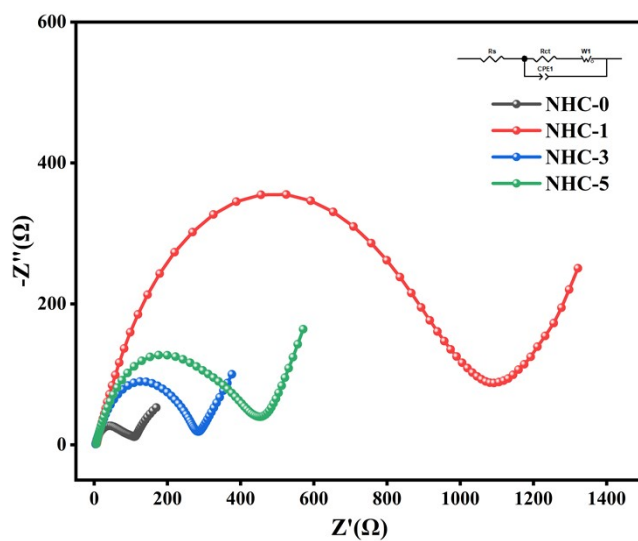

Figure S4. Nyquist plot

**Table S1 BET Surface Area and Electrochemical Performance Parameters of the Prepared Samples**

|       | SSA<br>[m <sup>2</sup> /g] | Pore<br>volume<br>[cm <sup>3</sup> /g] | Average<br>pore size<br>[nm] | Charge<br>capacity<br>[mAh g <sup>-1</sup> ] | Discharge<br>capacity<br>[mAh g <sup>-1</sup> ] | ICE<br>[%] |
|-------|----------------------------|----------------------------------------|------------------------------|----------------------------------------------|-------------------------------------------------|------------|
| NHC-0 | 20.8                       | 0.032                                  | 6.157                        | 254.3                                        | 467.1                                           | 54.45      |
| NHC-1 | 63.2                       | 0.082                                  | 3.209                        | 237.0                                        | 346.1                                           | 68.49      |
| NHC-3 | 128.0                      | 0.168                                  | 3.079                        | 315.5                                        | 441.6                                           | 71.44      |
| NHC-5 | 219.3                      | 0.101                                  | 3.158                        | 241.4                                        | 344.9                                           | 69.99      |

**Table S2 The EIS fitting parameters using the equivalent circuit**

|              | <b>Rs (<math>\Omega</math>)</b> | <b>Rct (<math>\Omega</math>)</b> |
|--------------|---------------------------------|----------------------------------|
| <b>NHC-0</b> | <b>3.535</b>                    | <b>79</b>                        |
| <b>NHC-1</b> | <b>6.403</b>                    | <b>1106</b>                      |
| <b>NHC-3</b> | <b>4.355</b>                    | <b>269</b>                       |
| <b>NHC-5</b> | <b>5.137</b>                    | <b>428</b>                       |



**Table S3 Comparison Table of Performance for Coal-Based Hard Carbon Anodes in Sodium-Ion Batteries**

| Precursor            | Activation Method                                     | Sodium storage capacity                             | ICE (%) | Rate Performance                                  | Cycle Stability                             | Ref.      |
|----------------------|-------------------------------------------------------|-----------------------------------------------------|---------|---------------------------------------------------|---------------------------------------------|-----------|
| Bituminous coal      | Citric Acid Activation (1300°C)                       | 315.5 (0.02 A g <sup>-1</sup> )                     | 71.44   | 86.7 mAh g <sup>-1</sup> (1 A g <sup>-1</sup> )   | 87.73% (300 cycles ∖ 0.1A g <sup>-1</sup> ) | This work |
| The long-flame coal  | One-Step Carbonization (1500°C)                       | 254 (0.02 A g <sup>-1</sup> )                       | 79      | 63 mAh g <sup>-1</sup> (1 A g <sup>-1</sup> )     | 72% (300 cycles ∖ 0.5A g <sup>-1</sup> )    | 26.       |
| Subbituminous coal   | H <sub>3</sub> PO <sub>4</sub> Activation (1000°C)    | 284.4 (0.02 A g <sup>-1</sup> )                     | 48.1    | 61.1 mAh g <sup>-1</sup> (1 A g <sup>-1</sup> )   | ——                                          | 15.       |
| Bituminous coal      | KOH/H <sub>2</sub> O <sub>2</sub> Activation (1300°C) | 308 mAh g <sup>-1</sup> (0.03 A g <sup>-1</sup> )   | 80.1    | 85 mAh g <sup>-1</sup> (0.5 A g <sup>-1</sup> )   | 80% (200 cycles ∖ 0.05A g <sup>-1</sup> )   | 27.       |
| Bituminous coal      | O <sub>2</sub> Activation (1400°C)                    | 303.1 mAh g <sup>-1</sup> (0.05 A g <sup>-1</sup> ) | 64.8    | 225.6 mAh g <sup>-1</sup> (1 A g <sup>-1</sup> )  | 73.1% (300 cycles ∖ 1A g <sup>-1</sup> )    | 28.       |
| the high-alkali coal | Metal Salt Activation (1200°C)                        | 322.4 mAh g <sup>-1</sup> (0.02 A g <sup>-1</sup> ) | 80      | 237.4 mAh g <sup>-1</sup> (0.2A g <sup>-1</sup> ) | ——                                          | 29.       |
